# Supplementary material for: Group 13 complexes of dipyridylmethane, a forgotten ligand in coordination chemistry
Source: Royal Society of Chemistry journal article supplement (doi:10.1039/c5dt02830b), 2015-01-01
Supplement: c5dt02830b1.pdf [file c5dt02830b1.pdf]

## Electronic Supporting Information

for

### Group 13 Complexes of Dipyridylmethane, a Forgotten Ligand in Coordination Chemistry

*Petra Vasko,<sup>a</sup> Virva Kinnunen,<sup>a</sup> Jani Moilanen,<sup>a</sup> Tracey L. Roemmele,<sup>b</sup> René T. Boéré,<sup>b</sup> Jari Konu,<sup>a</sup> and Heikki M. Tuononen<sup>a,\*</sup>*

<sup>a</sup> University of Jyväskylä, Department of Chemistry, Nanoscience Centre, P.O. Box 35, FI-40014 University of Jyväskylä, Finland. Phone: +358-40-805-3713, Fax: +358-14-260-2501, E-mail:

[heikki.m.tuononen@jyu.fi](mailto:heikki.m.tuononen@jyu.fi)

<sup>b</sup> Department of Chemistry and Biochemistry, University of Lethbridge, Lethbridge, AB, Canada T1K 3M4.

#### Table of Contents

|    |                                                                                                                                                            |     |
|----|------------------------------------------------------------------------------------------------------------------------------------------------------------|-----|
| 1. | Crystallographic details and selected structural parameters for <b>1a</b> ·CH <sub>2</sub> Cl <sub>2</sub> , <b>1b</b> ·THF, <b>2c</b> ·3·THF and <b>4</b> | S2  |
| 2. | <sup>1</sup> H NMR spectra and details of variable temperature NMR experiments                                                                             | S4  |
| 3. | Additional cyclic voltammetry data for <b>2a–d</b>                                                                                                         | S21 |
| 4. | X-ray crystallographic data of [H <sub>2</sub> (dpma)] <sup>2+</sup> [BCl <sub>4</sub> ] <sup>-</sup> [Cl] <sup>-</sup>                                    | S23 |
| 5. | Results from density functional theory calculations                                                                                                        | S25 |
| 6. | Notes and references                                                                                                                                       | S28 |

**1. Crystallographic details and selected structural parameters for 1a·CH<sub>2</sub>Cl<sub>2</sub>, 1b·THF, 2c, 3·THF and 4**

**Table 1** Crystallographic data for compounds [(dpma)<sub>2</sub>GaCl<sub>2</sub>]<sup>+</sup>[GaCl<sub>4</sub>]<sup>-</sup>·CH<sub>2</sub>Cl<sub>2</sub> (**1a**·CH<sub>2</sub>Cl<sub>2</sub>), [(dpma)<sub>2</sub>AlCl<sub>2</sub>]<sup>+</sup>[AlCl<sub>4</sub>]<sup>-</sup>·C<sub>4</sub>H<sub>8</sub>O (**1b**·THF), [(dpma)GaCl<sub>2</sub>]<sup>+</sup>[GaCl<sub>4</sub>]<sup>-</sup> (**2c**), (dpma)InCl<sub>3</sub>·C<sub>4</sub>H<sub>8</sub>O (**3**·THF) and (dpma)(BCl<sub>3</sub>)<sub>2</sub> (**4**)

|                                                                         | <b>1a</b> ·CH <sub>2</sub> Cl <sub>2</sub> <sup>b</sup>                        | <b>1b</b> ·THF <sup>a</sup>                                                     | <b>2c</b> <sup>b</sup>                                                         | <b>3</b> ·THF <sup>b</sup>                                         | <b>4</b> <sup>a</sup>                                                         |
|-------------------------------------------------------------------------|--------------------------------------------------------------------------------|---------------------------------------------------------------------------------|--------------------------------------------------------------------------------|--------------------------------------------------------------------|-------------------------------------------------------------------------------|
| emp. formula                                                            | C <sub>23</sub> H <sub>22</sub> Cl <sub>8</sub> Ga <sub>2</sub> N <sub>4</sub> | C <sub>92</sub> H <sub>88</sub> Al <sub>8</sub> Cl <sub>24</sub> N <sub>1</sub> | C <sub>11</sub> H <sub>10</sub> Cl <sub>6</sub> Ga <sub>2</sub> N <sub>2</sub> | C <sub>15</sub> H <sub>18</sub> Cl <sub>3</sub> InN <sub>2</sub> O | C <sub>11</sub> H <sub>10</sub> B <sub>2</sub> Cl <sub>6</sub> N <sub>2</sub> |
| formula weight                                                          | 777.49                                                                         | 2500.42                                                                         | 522.35                                                                         | 463.48                                                             | 404.53                                                                        |
| cryst. system                                                           | monoclinic                                                                     | triclinic                                                                       | orthorhombic                                                                   | monoclinic                                                         | triclinic                                                                     |
| space group                                                             | <i>P</i> 2 <sub>1</sub> / <i>c</i>                                             | <i>P</i> -1                                                                     | <i>Pbca</i>                                                                    | <i>P</i> 2 <sub>1</sub> / <i>n</i>                                 | <i>P</i> -1                                                                   |
| <i>a</i> , Å                                                            | 12.134(5)                                                                      | 13.0514(7)                                                                      | 9.87(5)                                                                        | 8.255(5)                                                           | 7.5511(4)                                                                     |
| <i>b</i> , Å                                                            | 12.930(5)                                                                      | 13.7004(8)                                                                      | 14.980(5)                                                                      | 15.233(5)                                                          | 10.7802(6)                                                                    |
| <i>c</i> , Å                                                            | 19.258(5)                                                                      | 16.9566(9)                                                                      | 24.874(5)                                                                      | 14.100(5)                                                          | 11.2368(6)                                                                    |
| $\alpha$ , deg.                                                         | 90.000                                                                         | 68.062(5)                                                                       | 90.000                                                                         | 90.000                                                             | 112.339(5)                                                                    |
| $\beta$ , deg.                                                          | 104.453(5)                                                                     | 83.116(4)                                                                       | 90.000                                                                         | 98.980(5)                                                          | 98.875(5)                                                                     |
| $\gamma$ , deg.                                                         | 90.000                                                                         | 82.799(5)                                                                       | 90.000                                                                         | 90.000                                                             | 101.174(5)                                                                    |
| <i>V</i> , Å <sup>3</sup>                                               | 2926(2)                                                                        | 2781.5(3)                                                                       | 3678(2)                                                                        | 1751(1)                                                            | 803.40(8)                                                                     |
| <i>Z</i>                                                                | 4                                                                              | 1                                                                               | 8                                                                              | 4                                                                  | 2                                                                             |
| <i>T</i> , °C                                                           | -150                                                                           | -150                                                                            | -150                                                                           | -150                                                               | -150                                                                          |
| $\rho_{\text{calcd}}$ , g cm <sup>-3</sup>                              | 1.765                                                                          | 1.493                                                                           | 1.887                                                                          | 1.758                                                              | 1.672                                                                         |
| $\mu$ , mm <sup>-1</sup>                                                | 2.595                                                                          | 6.433                                                                           | 3.794                                                                          | 1.809                                                              | 9.675                                                                         |
| crystal size, mm <sup>3</sup>                                           | 0.24×0.20×0.16                                                                 | 0.15×0.15×0.05                                                                  | 0.24×0.16×0.12                                                                 | 0.28×0.16×0.10                                                     | 0.30×0.16×0.09                                                                |
| <i>F</i> (000)                                                          | 1544.0                                                                         | 1272.0                                                                          | 2032.0                                                                         | 920.0                                                              | 404.00                                                                        |
| $\Theta$ range, deg                                                     | 2.39–25.02                                                                     | 4.59–66.60                                                                      | 2.60–25.02                                                                     | 3.66–25.02                                                         | 4.39–67.00                                                                    |
| reflns collected                                                        | 8768                                                                           | 18717                                                                           | 6007                                                                           | 5957                                                               | 5268                                                                          |
| unique reflns                                                           | 5151                                                                           | 9793                                                                            | 3225                                                                           | 3086                                                               | 2831                                                                          |
| <i>R</i> <sub>int</sub>                                                 | 0.0307                                                                         | 0.0626                                                                          | 0.0215                                                                         | 0.0165                                                             | 0.0248                                                                        |
| reflns [ <i>I</i> >2 $\sigma$ ( <i>I</i> )]                             | 4424                                                                           | 7794                                                                            | 2754                                                                           | 2874                                                               | 2667                                                                          |
| <i>R</i> <sub>1</sub> [ <i>I</i> >2 $\sigma$ ( <i>I</i> )] <sup>c</sup> | 0.0595                                                                         | 0.0811                                                                          | 0.0390                                                                         | 0.0232                                                             | 0.0554                                                                        |
| <i>wR</i> <sub>2</sub> (all data) <sup>d</sup>                          | 0.1145                                                                         | 0.2045                                                                          | 0.0684                                                                         | 0.0437                                                             | 0.1591                                                                        |
| GOF on <i>F</i> <sup>2</sup>                                            | 1.103                                                                          | 1.012                                                                           | 1.146                                                                          | 1.084                                                              | 1.085                                                                         |
| completeness                                                            | 0.997                                                                          | 0.998                                                                           | 0.993                                                                          | 0.997                                                              | 0.990                                                                         |

<sup>a</sup>  $\lambda$  (CuK $\alpha$ ) = 1.54184 Å. <sup>b</sup>  $\lambda$  (MoK $\alpha$ ) = 0.71073 Å. <sup>c</sup>  $R_1 = \Sigma |F_o| - |F_c| / \Sigma |F_o|$ . <sup>d</sup>  $wR_2 = [\Sigma w(F_o^2 - F_c^2)^2 / \Sigma wF_o^4]^{1/2}$ .

**Table 2** Selected bond lengths (Å) and angles (°) of compounds [(dpma)<sub>2</sub>GaCl<sub>2</sub>]<sup>+</sup>[GaCl<sub>4</sub>]<sup>-</sup>·CH<sub>2</sub>Cl<sub>2</sub> (**1a**·CH<sub>2</sub>Cl<sub>2</sub>), [(dpma)<sub>2</sub>AlCl<sub>2</sub>]<sup>+</sup>[AlCl<sub>4</sub>]<sup>-</sup>·C<sub>4</sub>H<sub>8</sub>O (**1b**·THF), [(dpma)GaCl<sub>2</sub>]<sup>+</sup>[GaCl<sub>4</sub>]<sup>-</sup> (**2c**), (dpma)InCl<sub>3</sub>·C<sub>4</sub>H<sub>8</sub>O (**3**·THF) and (dpma)(BCl<sub>3</sub>)<sub>2</sub> (**4**)

|                  | <b>1a</b> ·CH <sub>2</sub> Cl <sub>2</sub><br>(M = Ga) | <b>1b</b> ·THF<br>(M = Al) | <b>2c</b><br>(M = Ga) | <b>3</b> ·THF<br>(M = In) | <b>4</b><br>(M = B) |
|------------------|--------------------------------------------------------|----------------------------|-----------------------|---------------------------|---------------------|
| M(1)-N(1)        | 2.113(4)                                               | 2.060(4)                   | 1.964(3)              | 2.295(2)                  | 1.621(4)            |
| M(1)-N(2)        | 2.145(4)                                               | 2.081(3)                   | 1.961(3)              | 2.323(2)                  | -                   |
| M(1)-N(3)        | 2.126(4)                                               | 2.063(3)                   | -                     | -                         | -                   |
| M(1)-N(4)        | 2.115(4)                                               | 2.057(4)                   | -                     | -                         | -                   |
| M(2)-N(2)        | -                                                      | -                          | -                     | -                         | 1.612(4)            |
| M(1)-Cl(1)       | 2.316(1)                                               | 2.268(1)                   | 2.133(2)              | 2.4422(8)                 | 1.843(3)            |
| M(1)-Cl(2)       | 2.296(1)                                               | 2.283(1)                   | 2.119(1)              | 2.4226(8)                 | 1.851(3)            |
| M(1)-Cl(3)       | -                                                      | -                          | -                     | 2.452(1)                  | 1.829(3)            |
| M(2)-Cl(4)       | -                                                      | -                          | -                     | -                         | 1.849(3)            |
| M(2)-Cl(5)       | -                                                      | -                          | -                     | -                         | 1.844(3)            |
| M(2)-Cl(6)       | -                                                      | -                          | -                     | -                         | 1.853(3)            |
| N(1)-C(5)        | 1.351(6)                                               | 1.354(5)                   | 1.343(5)              | 1.349(3)                  | 1.366(4)            |
| N(2)-C(7)        | 1.351(6)                                               | 1.353(5)                   | 1.347(5)              | 1.352(3)                  | 1.371(4)            |
| N(3)-C(16)       | 1.341(6)                                               | 1.360(6)                   | -                     | -                         | -                   |
| N(4)-C(18)       | 1.356(6)                                               | 1.363(6)                   | -                     | -                         | -                   |
| C(5)-C(6)        | 1.512(7)                                               | 1.517(6)                   | 1.513(5)              | 1.512(3)                  | 1.516(4)            |
| C(6)-C(7)        | 1.518(7)                                               | 1.508(6)                   | 1.502(5)              | 1.507(3)                  | 1.507(4)            |
| C(16)-C(17)      | 1.513(7)                                               | 1.505(7)                   | -                     | -                         | -                   |
| C(17)-C(18)      | 1.500(7)                                               | 1.514(6)                   | -                     | -                         | -                   |
|                  |                                                        |                            |                       |                           |                     |
| N(1)-M(1)-N(2)   | 85.5(2)                                                | 86.1(2)                    | 93.2(1)               | 79.25(7)                  | -                   |
| N(3)-M(1)-N(4)   | 88.0(2)                                                | 87.0(2)                    | -                     | -                         | -                   |
| N(1)-M(1)-Cl(1)  | 92.8(1)                                                | 96.5(1)                    | 109.51(9)             | 164.19(5)                 | 106.8(2)            |
| N(1)-M(1)-Cl(2)  | 88.1(1)                                                | 91.1(1)                    | 110.1(1)              | 94.10(6)                  | 109.3(2)            |
| N(1)-M(1)-Cl(3)  | -                                                      | -                          | -                     | 93.23(5)                  | 111.4(2)            |
| N(2)-M(1)-Cl(1)  | 176.6(1)                                               | 176.3(1)                   | 110.8(1)              | 87.67(6)                  | -                   |
| N(2)-M(1)-Cl(2)  | 87.4(1)                                                | 87.0(1)                    | 114.3(1)              | 165.31(5)                 | -                   |
| N(2)-M(1)-Cl(3)  | -                                                      | -                          | -                     | 97.70(6)                  | -                   |
| N(2)-M(2)-Cl(4)  | -                                                      | -                          | -                     | -                         | 109.3(2)            |
| N(2)-M(2)-Cl(5)  | -                                                      | -                          | -                     | -                         | 111.2(2)            |
| N(2)-M(2)-Cl(6)  | -                                                      | -                          | -                     | -                         | 108.1(2)            |
| N(3)-M(1)-Cl(1)  | 85.1(1)                                                | 87.2(1)                    | -                     | -                         | -                   |
| N(3)-M(1)-Cl(2)  | 179.3(1)                                               | 176.7(1)                   | -                     | -                         | -                   |
| N(4)-M(1)-Cl(1)  | 88.3(1)                                                | 90.0(1)                    | -                     | -                         | -                   |
| N(4)-M(1)-Cl(2)  | 92.0(1)                                                | 95.3(1)                    | -                     | -                         | -                   |
| Cl(1)-M(1)-Cl(2) | 95.55(5)                                               | 90.38(5)                   | 116.42(5)             | 96.50(3)                  | 111.8(2)            |
| Cl(1)-M(1)-Cl(3) | -                                                      | -                          | -                     | 97.32(4)                  | 109.9(2)            |
| Cl(2)-M(1)-Cl(3) | -                                                      | -                          | -                     | 95.73(3)                  | 107.7(2)            |
| Cl(4)-M(2)-Cl(5) | -                                                      | -                          | -                     | -                         | 109.0(2)            |
| Cl(4)-M(2)-Cl(6) | -                                                      | -                          | -                     | -                         | 111.2(2)            |

## 2. $^1\text{H}$ NMR spectra and details of variable temperature NMR experiments

### $^1\text{H}$ NMR discussion related to the 1:1 reaction between dpma and $\text{GaCl}_3$

The room temperature  $^1\text{H}$  NMR spectrum (in  $d_8$ -THF) recorded for the product from 1:1 reaction between dpma and  $\text{GaCl}_3$  in  $\text{Et}_2\text{O}$  shows a singlet at 4.14 ppm and four multiplets from 7.58 to 8.99 ppm (Fig. S1). Although all  $^1\text{H}$  NMR signals are of equal intensity, the singlet corresponding to the methylene hydrogens is extremely broad, as is also the case for one of the multiplets in the aromatic region. This indicates the presence of a dynamic process with an exchange rate faster than the NMR timescale. Consequently, the product was characterized in  $d_8$ -THF solution using variable temperature  $^1\text{H}$  NMR spectroscopy.

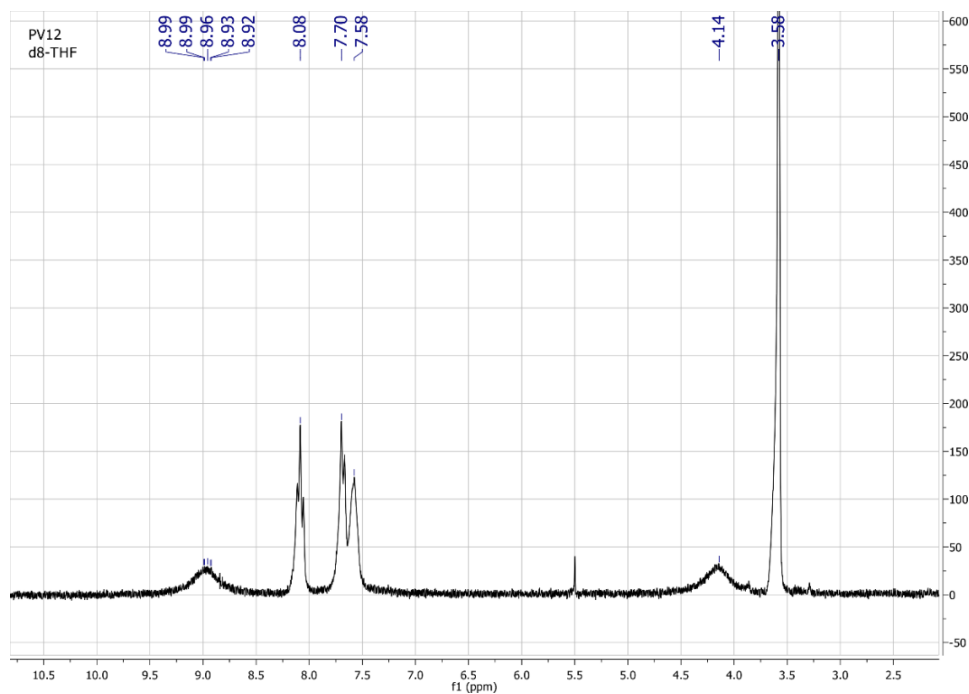

**Fig. S1**  $^1\text{H}$  NMR spectrum (in  $d_8$ -THF) recorded for the product from 1:1 reaction between dpma and  $\text{GaCl}_3$  in  $\text{Et}_2\text{O}$ .

When the temperature is lowered, the  $^1\text{H}$  NMR signals start to separate below  $0\text{ }^\circ\text{C}$  (Fig. S2). At  $-40\text{ }^\circ\text{C}$ , the  $^1\text{H}$  NMR spectrum becomes well resolved and there is hardly any change in its appearance when further cooling the sample to  $-80\text{ }^\circ\text{C}$ . It is obvious from Fig. S2 that at temperatures below  $-40\text{ }^\circ\text{C}$ , the  $^1\text{H}$  NMR spectrum is in the slow-exchange limit and consists of two AB doublets (3.34 and 4.40 ppm,  $^2J(^1\text{H}, ^1\text{H}) = 16.5\text{ Hz}$ ) for the methylene hydrogens,<sup>1</sup> as well as of eight multiplets of equal intensity from 7.52 to 9.90 ppm of which two are partially overlapping at 7.70 ppm. The low temperature  $^1\text{H}$  NMR spectrum is well-resolved and reveals the presence of a minor component with a singlet for the methylene hydrogens at 4.62 ppm (at  $-80\text{ }^\circ\text{C}$ ) along with several partially resolved multiplets in the aromatic region. The solution behaviour of the reaction product can be explained by assuming that the reaction yields the expected salt  $[(\text{dpma})_2\text{GaCl}_2]^+[\text{GaCl}_4]^-$  (**1a**) as the primary product, but that it also gives the salt  $[(\text{dpma})\text{GaCl}_2]^+[\text{Cl}]^-$  (**2a**) in equilibrium with **1a**. Both products have 1:1 ligand to  $\text{GaCl}_3$  ratio and they are able to interconvert in solution *i.e.*  $[(\text{dpma})_2\text{GaCl}_2]^+[\text{GaCl}_4]^-$  (**1a**)  $\rightleftharpoons$   $2[(\text{dpma})\text{GaCl}_2]^+[\text{Cl}]^-$  (**2a**).

The above explanation is consistent with the observed NMR data. Specifically, the major component present at low temperatures can be identified as  $[\textit{cis}-(\text{dpma})_2\text{GaCl}_2]^+$  cation: both the number and intensities of the observed signals agree with a rigid structure with two identical dpma ligands, each containing two inequivalent pyridyl moieties and methylene hydrogens ( $C_2$  symmetry).<sup>2</sup> The minor component present in the low temperature  $^1\text{H}$  NMR spectrum would then be the  $[(\text{dpma})\text{GaCl}_2]^+$  cation with a tetrahedral metal centre and  $C_s$  point group, though most of the multiplets arising from pyridyl bound hydrogens are not resolved. We note that the low temperature spectrum shows no evidence of free dpma ligand that displays a characteristic methylene singlet at *ca.* 4.25 ppm.

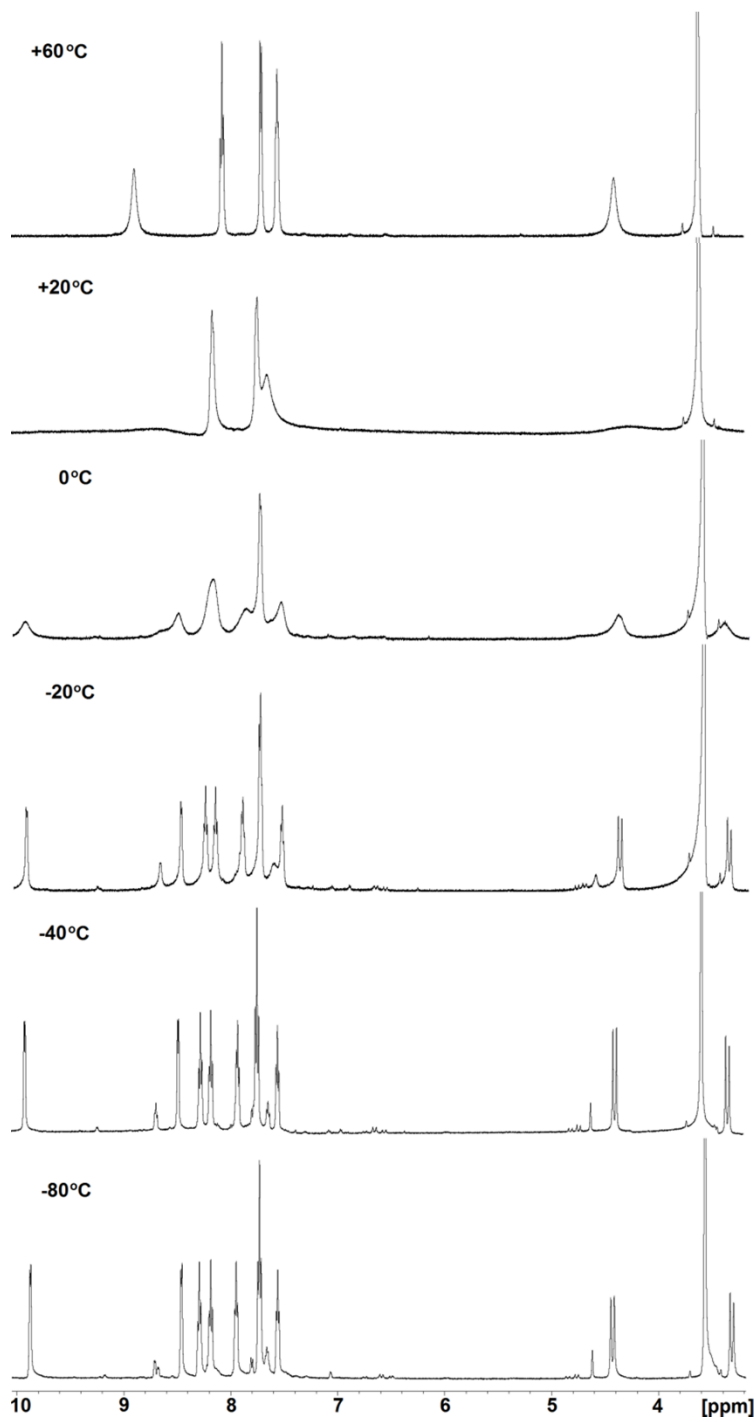

**Fig. S2** Variable temperature <sup>1</sup>H NMR spectra (in *d*<sub>8</sub>-THF) recorded for the product from 1:1 reaction between dpma and GaCl<sub>3</sub> in Et<sub>2</sub>O.

Detailed NMR investigations revealed that the dynamic process  $[(\text{dpma})_2\text{GaCl}_2]^+[\text{GaCl}_4]^-$  (**1a**)  $\rightleftharpoons$   $2[(\text{dpma})\text{GaCl}_2]^+[\text{Cl}]^-$  (**2a**) is not only temperature but also solvent dependent. While the room temperature  $^1\text{H}$  NMR spectrum of the product in  $\text{CD}_2\text{Cl}_2$  is similar to that in  $d_8$ -THF (Fig. S3), a complete conversion to  $[(\text{dpma})\text{GaCl}_2]^+[\text{Cl}]^-$  *i.e.* **2a** takes place rapidly in  $\text{CD}_3\text{CN}$  (Fig. S4). However, **2a** was found to be unstable in  $\text{CD}_3\text{CN}$  and it decomposes gradually into the free dpma ligand as well as to other uncharacterized products.

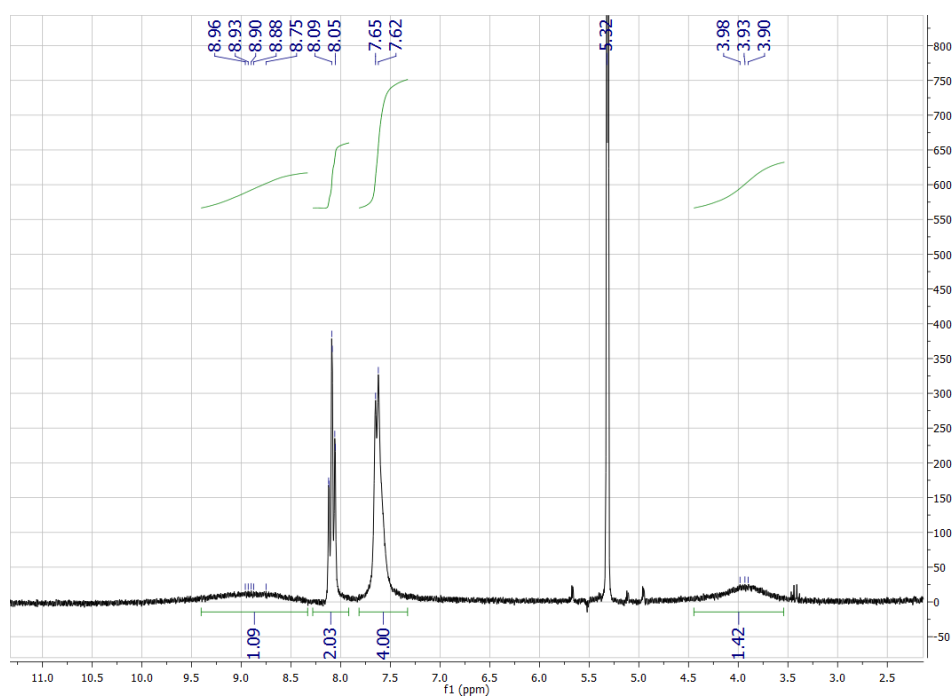

**Fig. S3**  $^1\text{H}$  NMR spectrum (in  $\text{CD}_2\text{Cl}_2$ ) recorded for the product from 1:1 reaction between dpma and  $\text{GaCl}_3$  in  $\text{Et}_2\text{O}$ . Quartet at 3.4 ppm is residual  $\text{Et}_2\text{O}$ .

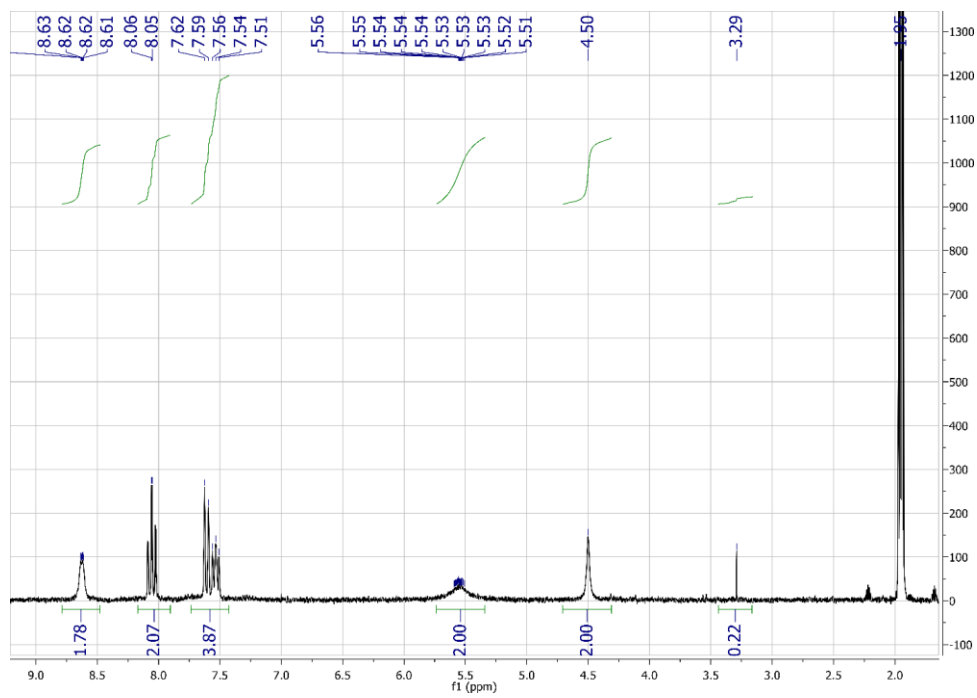

**Fig. S4**  $^1\text{H}$  NMR spectrum (in  $\text{CD}_3\text{CN}$ ) recorded for the product from 1:1 reaction between dpma and  $\text{GaCl}_3$  in  $\text{Et}_2\text{O}$ .



## **<sup>1</sup>H NMR discussion related to the 1:1 reaction between dpma and AlCl<sub>3</sub>**

The room temperature <sup>1</sup>H NMR spectrum (in *d*<sub>8</sub>-THF) for the product from 1:1 reaction between dpma and AlCl<sub>3</sub> in Et<sub>2</sub>O shows that the reaction yields a mixture of two main species as judged by the number and intensity of signals in the aliphatic region (Fig. S5): a singlet at 4.43 ppm as well as two AB doublets at 3.09 and 4.33 ppm (<sup>2</sup>J(<sup>1</sup>H,<sup>1</sup>H) = 17.5 Hz). There is no indication of ligand redistribution with an exchange rate faster than the NMR timescale. The spectrum can be compared to the low temperature <sup>1</sup>H NMR data of the equilibrium between **1a** and **2a** (Fig. S2), which allows the identification of the main products from the AlCl<sub>3</sub> reaction as [*cis*-(dpma)<sub>2</sub>AlCl<sub>2</sub>]<sup>+</sup>[GaCl<sub>4</sub>]<sup>-</sup> (**1b**) and [(dpma)AlCl<sub>2</sub>]<sup>+</sup>[Cl]<sup>-</sup> (**2b**) in *ca.* 2:1 ratio at room temperature. Interestingly, the <sup>1</sup>H NMR spectrum shows also a second very low-intensity set of AB doublets at 4.70 and 6.69 ppm (<sup>2</sup>J(<sup>1</sup>H,<sup>1</sup>H) = 16.4 Hz). The identity of this minor product cannot be univocally established as the corresponding multiplets in the aromatic region are not resolved, but considering the similarity of its spectral data with [*cis*-(dpma)<sub>2</sub>GaCl<sub>2</sub>]<sup>+</sup>[GaCl<sub>4</sub>]<sup>-</sup>, we tentatively assign the unknown species as [*trans*-(dpma)<sub>2</sub>AlCl<sub>2</sub>]<sup>+</sup>[AlCl<sub>4</sub>]<sup>-</sup>. If the <sup>1</sup>H NMR spectrum of the product was measured in CD<sub>3</sub>CN a conversion from a mixture of **1b** and **2b** to pure **2b** took place within a couple of hours. The salt **2b** could also be obtained pure by doing the synthesis in CH<sub>3</sub>CN (Fig. S6).

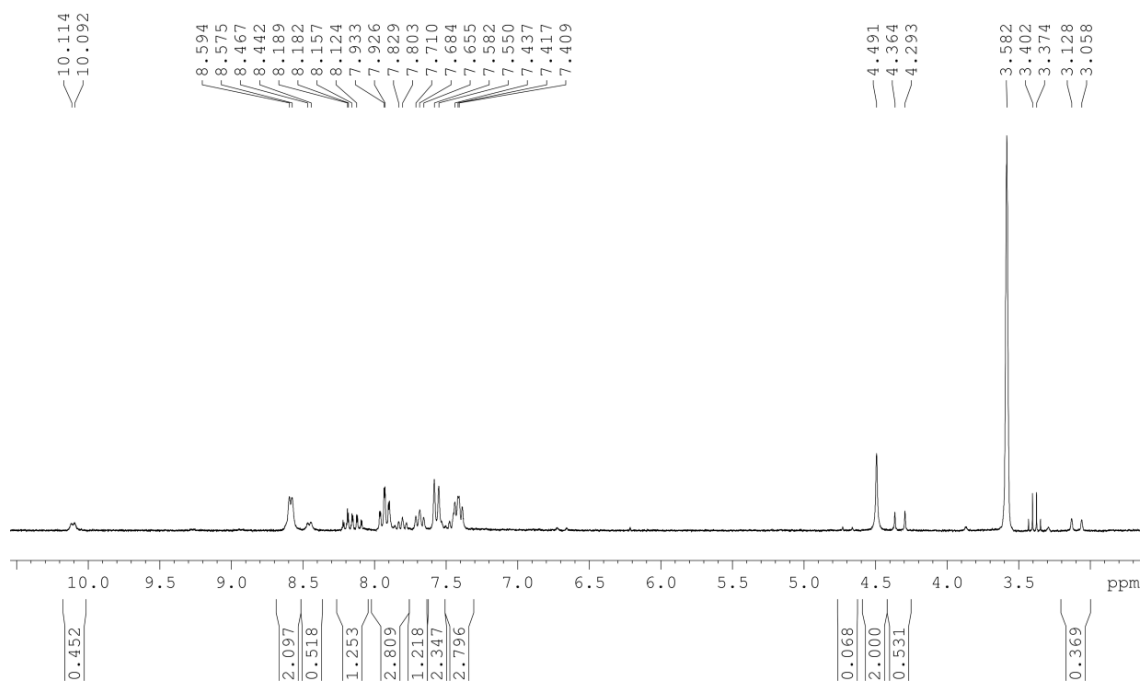

**Fig. S5**  $^1\text{H}$  NMR spectrum (in  $d_8$ -THF) recorded for the product from 1:1 reaction between dpma and  $\text{AlCl}_3$  in  $\text{Et}_2\text{O}$ . Quartet at 3.4 ppm is residual  $\text{Et}_2\text{O}$ .

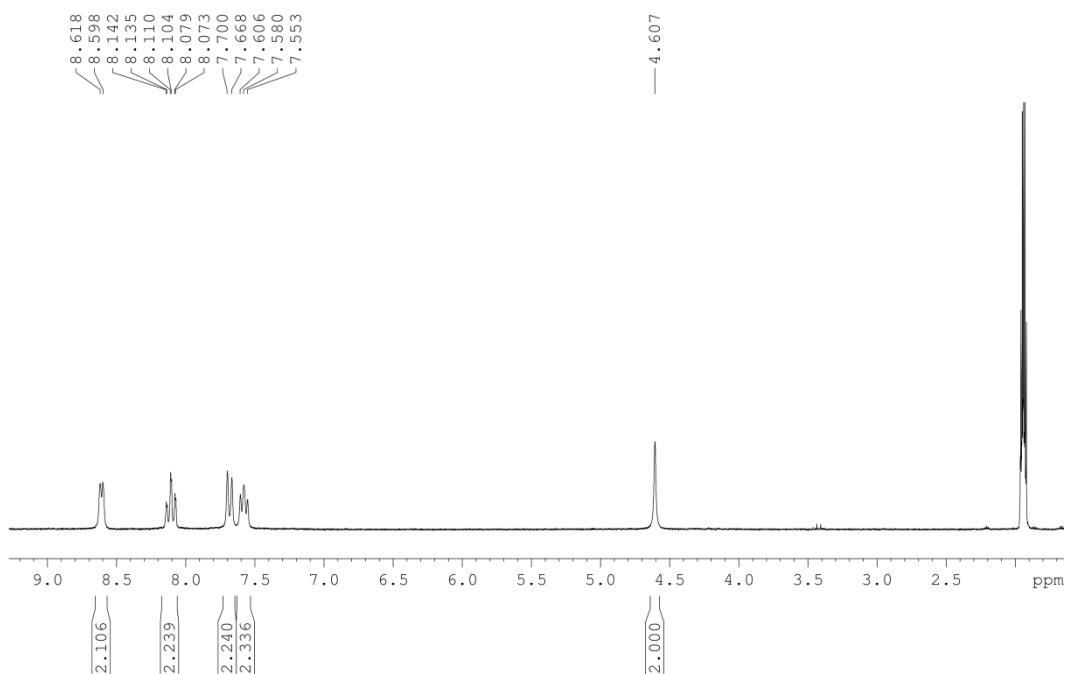

**Fig. S6**  $^1\text{H}$  NMR spectrum (in  $\text{CD}_3\text{CN}$ ) recorded for the product (**2b**) from 1:1 reaction between dpma and  $\text{AlCl}_3$  in  $\text{CH}_3\text{CN}$ . Quartet at 3.4 ppm is residual  $\text{Et}_2\text{O}$ .

## <sup>1</sup>H NMR discussion related to the 1:2 reaction between dpma and GaCl<sub>3</sub>

The room temperature <sup>1</sup>H NMR spectrum (in *d*<sub>8</sub>-THF) recorded for the product from 1:2 reaction between dpma and GaCl<sub>3</sub> in Et<sub>2</sub>O is similar to that found for the 1:1 reaction (Fig. S7): a very broad singlet for the methylene hydrogens is observed at 4.75 ppm, while the pyridyl bound hydrogens show a set of multiplets from 7.81 to 8.97 ppm with a relative integration of 2:8. The broadness of the observed <sup>1</sup>H NMR signals is reminiscent of the solution behaviour observed earlier, which prompted us to conduct variable temperature NMR measurements also in this case.

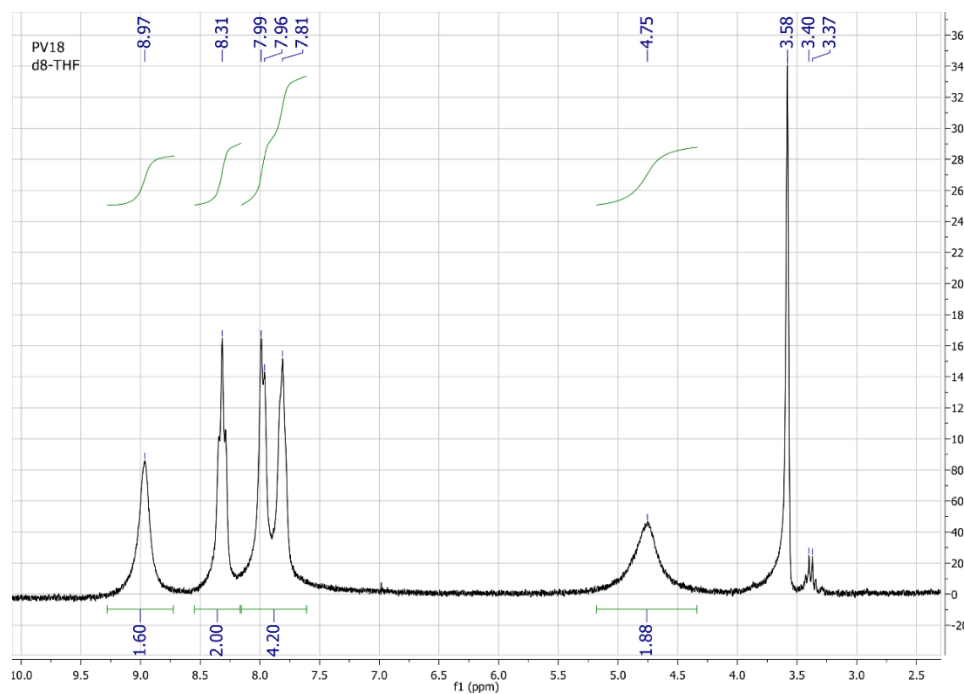

**Fig. S7** <sup>1</sup>H NMR spectrum (in *d*<sub>8</sub>-THF) recorded for the product from 1:2 reaction between dpma and GaCl<sub>3</sub> in Et<sub>2</sub>O. Quartet at 3.4 ppm is residual Et<sub>2</sub>O.

The  $^1\text{H}$  NMR spectra (in  $d_8$ -THF) recorded for the product within temperature range from  $-60$  to  $+40$   $^\circ\text{C}$  show separation of merged signals at  $-40$   $^\circ\text{C}$  (Fig. S8), which allows identification of the cations  $[(\text{dpma})\text{GaCl}_2]^+$  (singlet at 4.97 ppm) and  $[(\text{dpma})_2\text{GaCl}_2]^+$  (AB doublets at 3.34 and 4.40 ppm) as the two species, present in ca. 3:1 ratio. Hence, the primary product from the reaction is the salt  $[(\text{dpma})\text{GaCl}_2]^+[\text{GaCl}_4]^-$  (**2c**), as expected from reaction stoichiometry. However, a significant amount of the cation  $[(\text{dpma})_2\text{GaCl}_2]^+$  is also present in solution at lower temperatures.

Detailed NMR investigations revealed that the dynamic process is not only temperature but also solvent dependent. In  $\text{CD}_2\text{Cl}_2$ , the NMR data are consistent with **2c** being the only species present in solution (Fig. S9), whereas a very small amount of **1a** is visible in the  $\text{CD}_3\text{CN}$  spectrum with no indication of a dynamic process that is faster than the NMR timescale (Fig. S10).

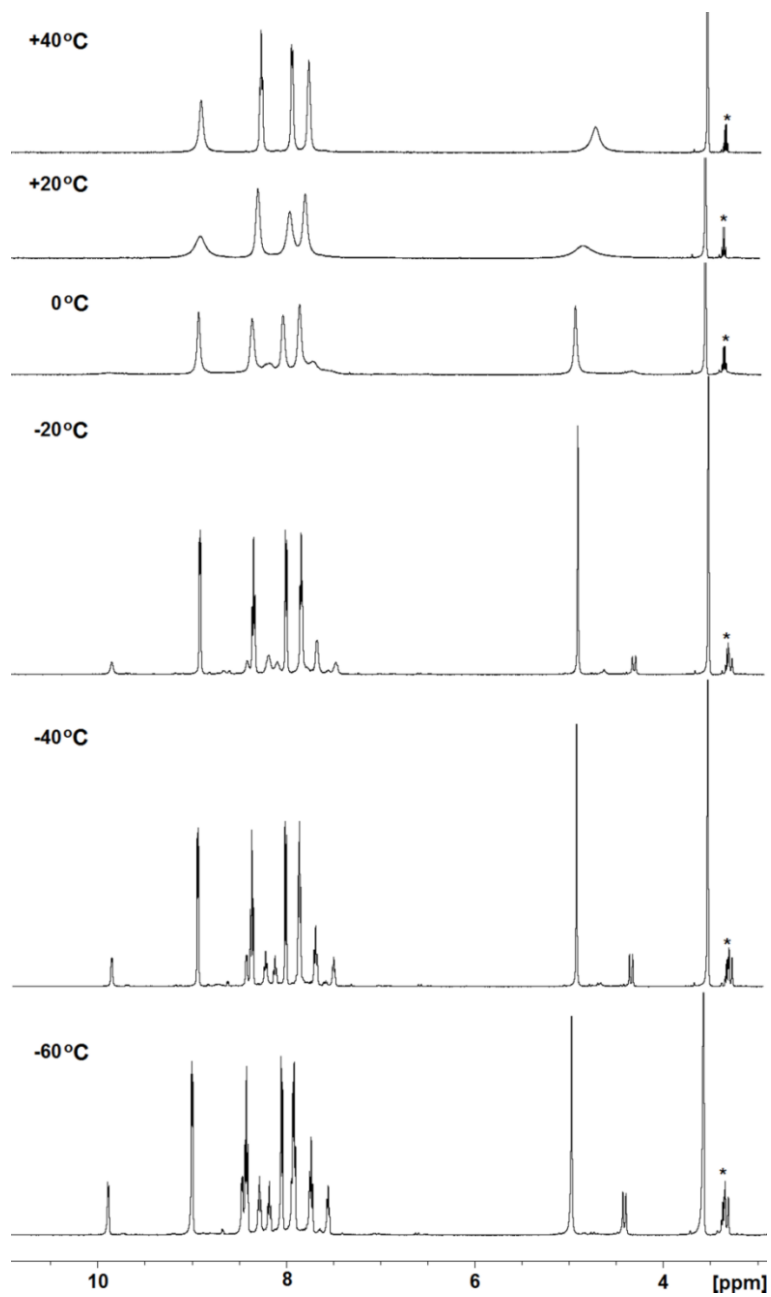

**Fig. S8** Variable temperature  $^1\text{H}$  NMR spectra (in  $d_8$ -THF) recorded for the product from 1:2 reaction between dpma and  $\text{GaCl}_3$  in  $\text{Et}_2\text{O}$ . Quartet at 3.4 ppm is residual  $\text{Et}_2\text{O}$ .

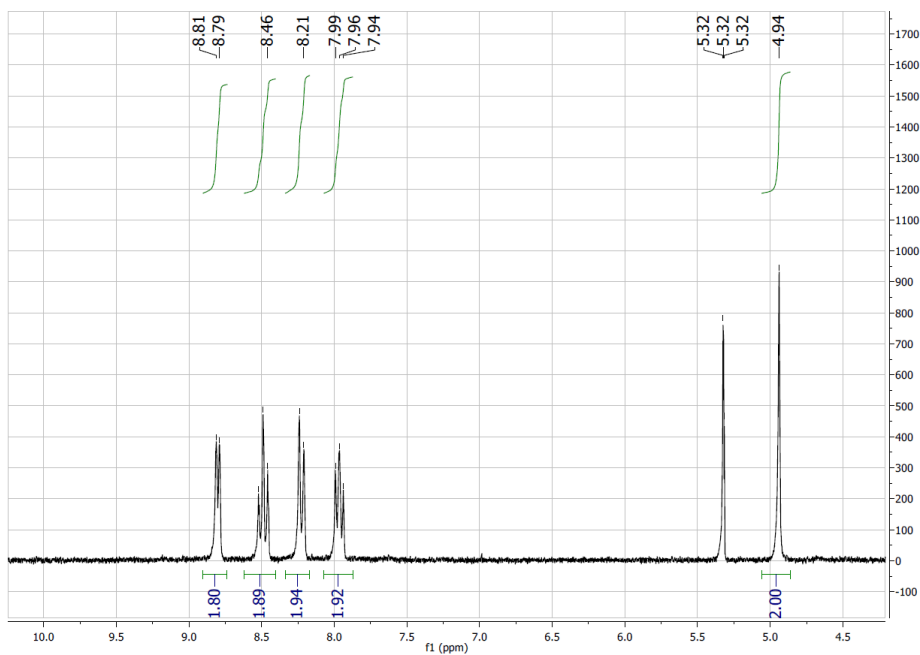

**Fig. S9**  $^1\text{H}$  NMR spectrum (in  $\text{CD}_2\text{Cl}_2$ ) recorded for the product from 1:2 reaction between dpma and  $\text{GaCl}_3$  in  $\text{Et}_2\text{O}$ .

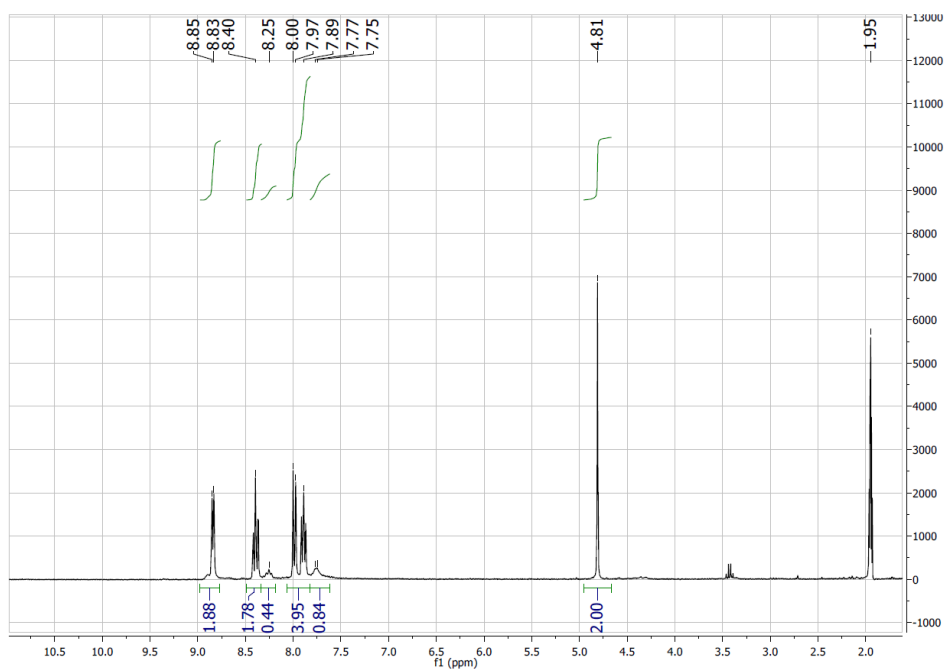

**Fig. S10**  $^1\text{H}$  NMR spectrum (in  $\text{CD}_3\text{CN}$ ) recorded for the product from 1:2 reaction between dpma and  $\text{GaCl}_3$  in  $\text{Et}_2\text{O}$ . Quartet at 3.4 ppm is residual  $\text{Et}_2\text{O}$ .

## <sup>1</sup>H NMR discussion related to the 1:2 reaction between dpma and AlCl<sub>3</sub>

The room temperature <sup>1</sup>H NMR spectrum (in *d*<sub>8</sub>-THF) for the product from 1:2 reaction between dpma and AlCl<sub>3</sub> in Et<sub>2</sub>O shows the formation of three distinct products in an analogous fashion to what was observed when using a 1:1 reagent ratio (Fig. S11). However, if the reaction was carried out in CH<sub>3</sub>CN, a single product **2d** was formed (Fig. S12). The salt **2d**, [(dpma)AlCl<sub>2</sub>]<sup>+</sup>[AlCl<sub>4</sub>]<sup>-</sup>, could also be obtained by treating [(dpma)AlCl<sub>2</sub>]<sup>+</sup>[Cl]<sup>-</sup> (**2b**) with an equimolar amount of AlCl<sub>3</sub> (Fig. S13).

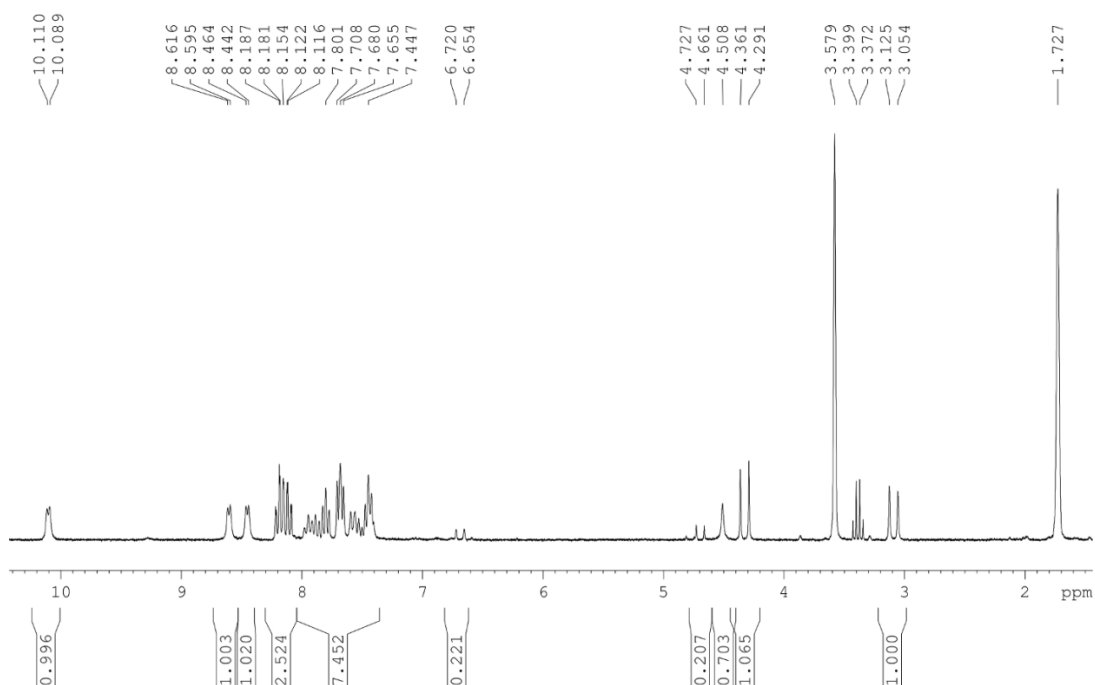

**Fig. S11** <sup>1</sup>H NMR spectrum (in *d*<sub>8</sub>-THF) recorded for the product from 1:2 reaction between dpma and AlCl<sub>3</sub> in Et<sub>2</sub>O. Quartet at 3.4 ppm is residual Et<sub>2</sub>O.

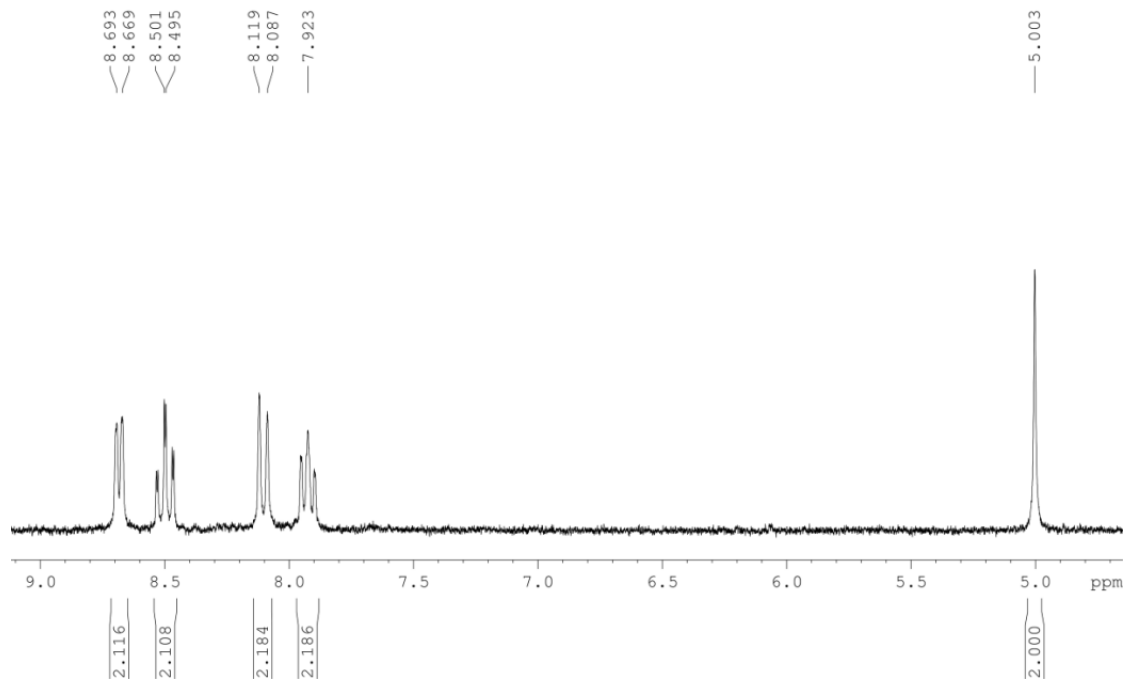

**Fig. S12**  $^1\text{H}$  NMR spectrum (in  $\text{CD}_3\text{CN}$ ) recorded for the product (**2d**) from 1:2 reaction between dpma and  $\text{AlCl}_3$  in  $\text{CH}_3\text{CN}$ .

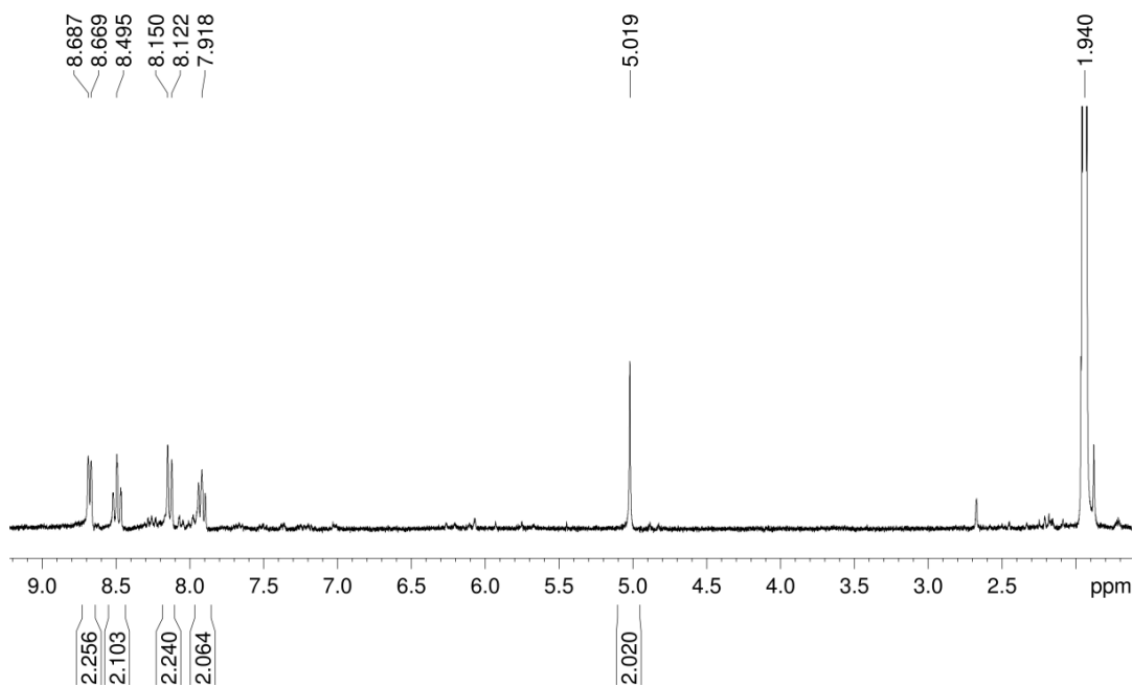

**Fig. S13**  $^1\text{H}$  NMR spectrum (in  $\text{CD}_3\text{CN}$ ) recorded for the product (**2d**) from 1:1 reaction between **2b** and  $\text{AlCl}_3$ . Singlet at 2.6 ppm and multiplet at 7.2 ppm is residual toluene.



**$^1\text{H}$  NMR discussion related to the 1:1 and 1:2 reactions between dpma and  $\text{InCl}_3$**

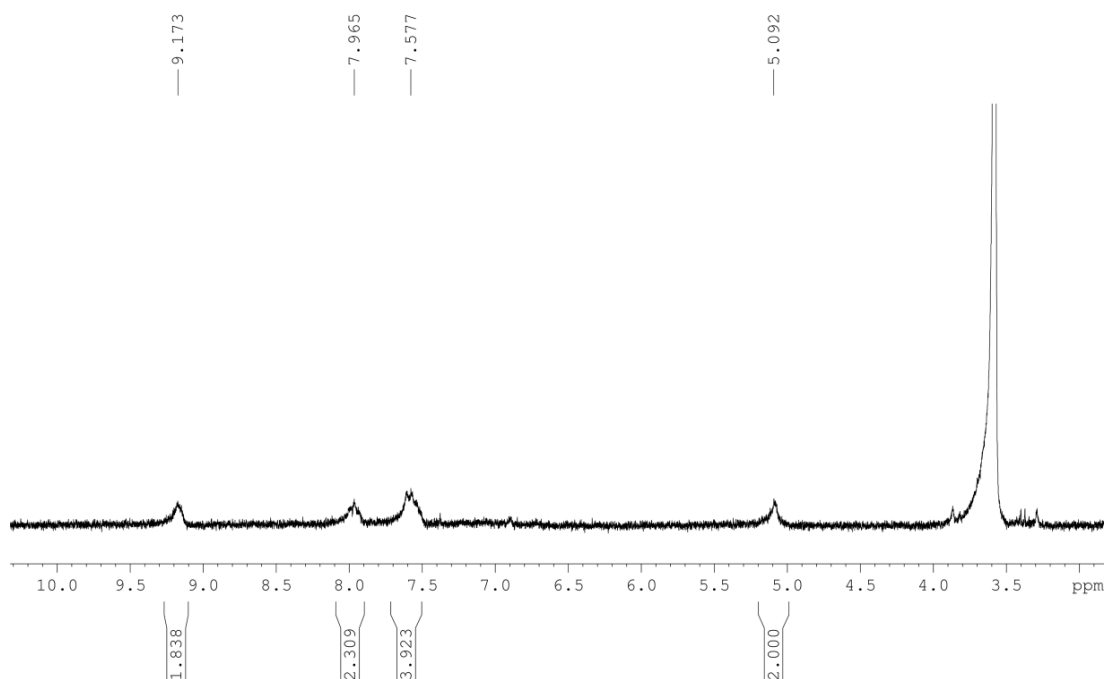

**Fig. S14**  $^1\text{H}$  NMR spectrum (in  $d_8$ -THF) recorded for the product (**3**) from 1:1 reaction between dpma and  $\text{InCl}_3$ . Quartet at 3.3 ppm is residual  $\text{Et}_2\text{O}$ .

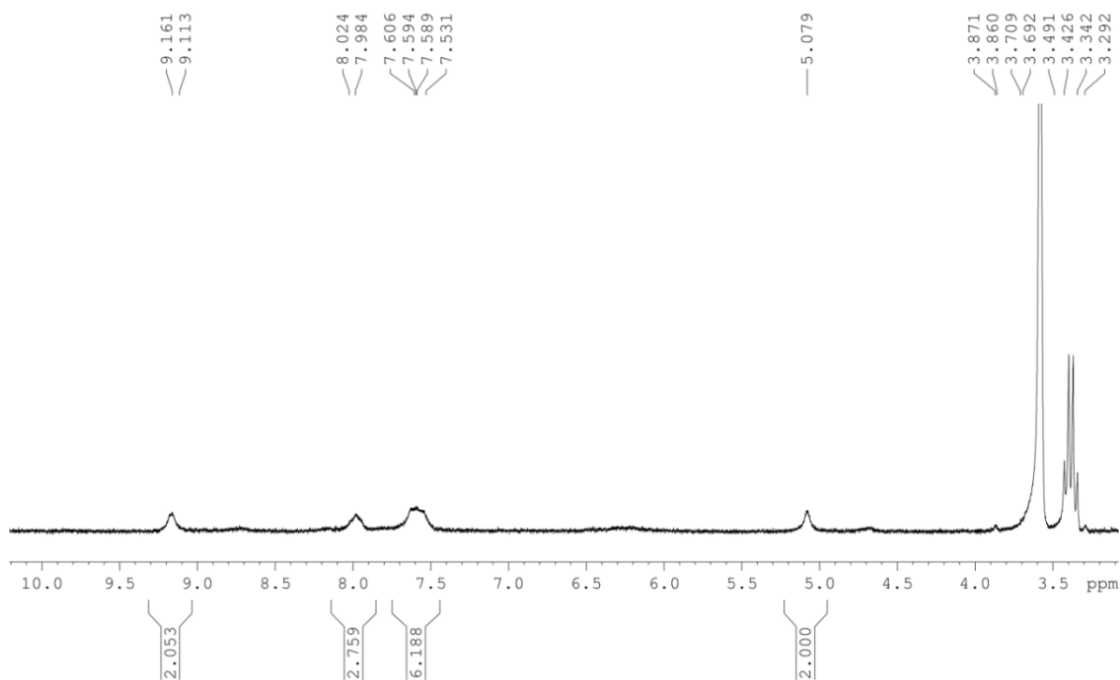

**Fig. S15**  $^1\text{H}$  NMR spectrum (in  $d_8$ -THF) recorded for the product (**3**) from 1:2 reaction between dpma and  $\text{InCl}_3$ . Quartet at 3.3 ppm is residual  $\text{Et}_2\text{O}$ .

**$^1\text{H}$  NMR discussion related to the 1:2 reaction between dpma and  $\text{BCl}_3$**

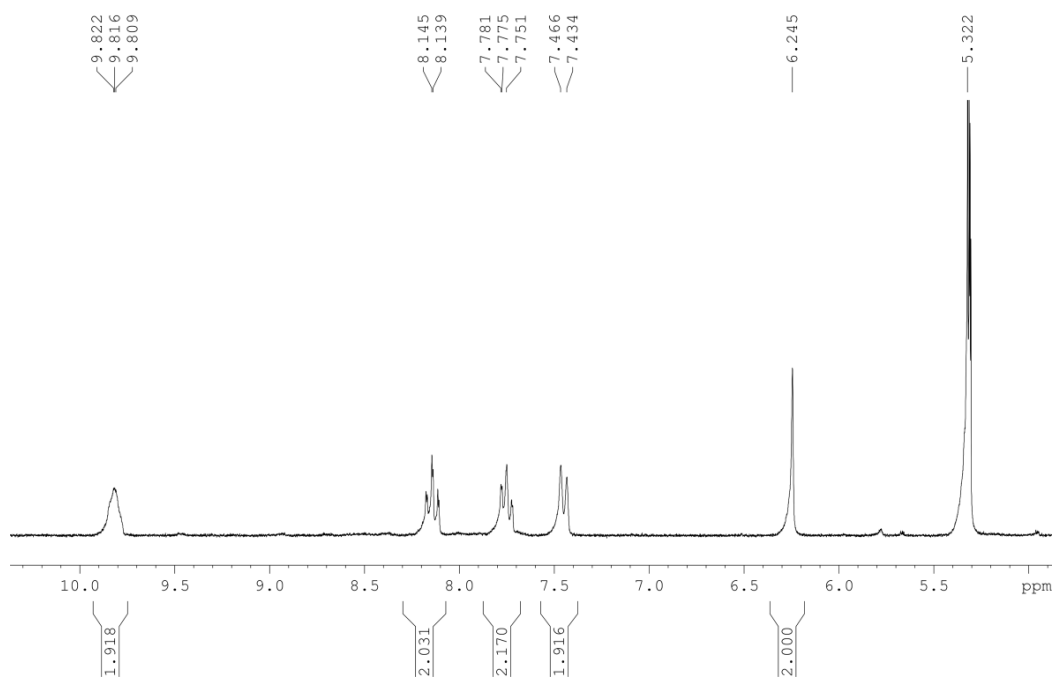

**Fig. S16**  $^1\text{H}$  NMR spectrum (in  $\text{CD}_2\text{Cl}_2$ ) recorded for the product (**4**) from 1:2 reaction between dpma and  $\text{BCl}_3$ .

## **<sup>1</sup>H NMR discussion related to the 1:1 reaction between dpma and BCl<sub>3</sub>**

The room temperature <sup>1</sup>H NMR spectrum (in CD<sub>2</sub>Cl<sub>2</sub>) for the product from 1:1 reaction between dpma and BCl<sub>3</sub> in toluene is very complex (Fig. S17) and shows that the solution phase contains three major products based on the three singlets at 4.53, 5.23 and 5.49 ppm; a similar mixture was observed if the reaction was performed in Et<sub>2</sub>O. There are also two singlets at 5.71 and 6.25 ppm, indicative of two minor products, of which the former is not discussed further.

Of all the singlets observed, the one at 6.25 ppm belongs to the diadduct **4**, though only one of the associated four multiplets in the aromatic region (broad doublet at 9.81 ppm) is resolved. The singlet at 4.53 ppm is assigned to the salt [(dpma)BCl<sub>2</sub>][Cl]<sup>-</sup> based on the spectral information for **2a** and **2b**. This signal should be accompanied with four equal intensity multiplets at the aromatic region of which the doublet and triplet at 7.52 and 8.09 ppm, respectively, are the only ones that are adequately resolved. The singlet at 5.49 ppm is assigned to the neutral complex (dpme)BCl<sub>2</sub>. This compound should also display four equal intensity multiplets, each with a relative integration of 2:1 to the methene bridge signal. In good agreement with this assignment, the spectrum in Fig. S17 shows a triplet at 6.60 ppm as well as two doublets at 6.84 and 8.22 ppm; the second triplet expected for this species is not resolved. The last unknown singlet at 5.23 ppm is tentatively assigned to the monoadduct (dpma)BCl<sub>3</sub>. This species has an asymmetric structure and should therefore display eight equal intensity multiplets in the aromatic region. However, due to the flexibility of the dpma backbone, a singlet is expected for the methylene hydrogens. The experimental spectrum displays a number of high-intensity signals from 7.2 to 8.5 ppm of which none can be assigned to the monoadduct with certainty. However, we note that the broad doublet at 9.71 ppm has the expected relative integration with the singlet at 5.23 ppm,

and it is also very close, but not identical, to one of the doublets observed for the related diadduct **4** at 9.81 ppm.

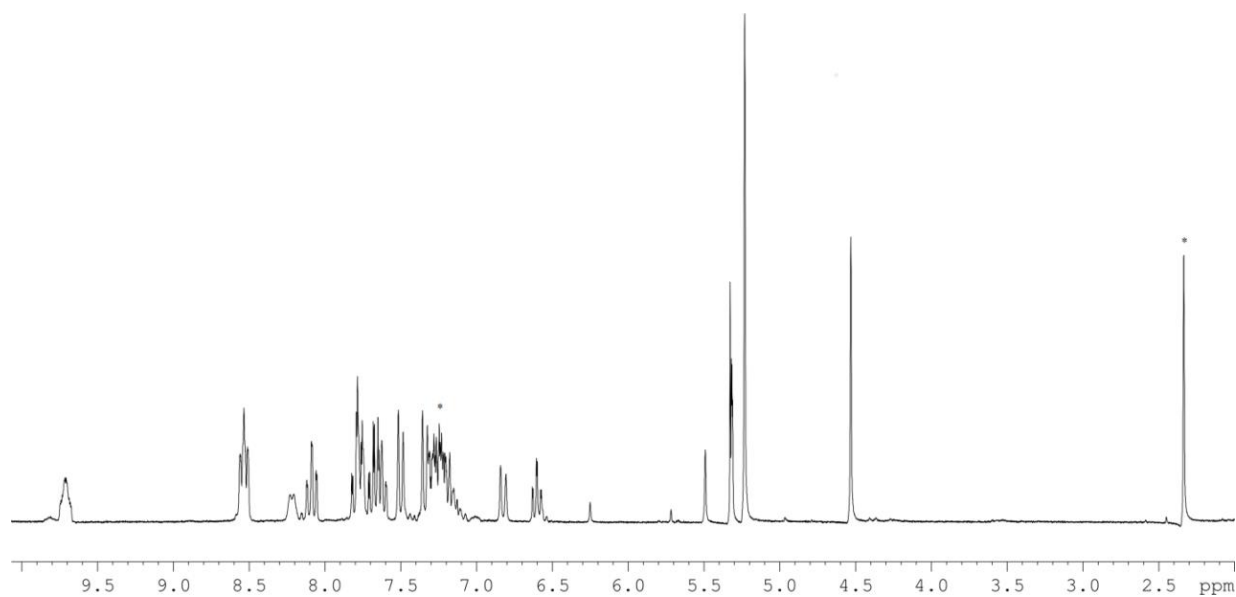

**Fig. S17**  $^1\text{H}$  NMR spectrum of the product mixture from the 1:1 reaction between dpma and  $\text{BCl}_3$  in  $\text{CD}_2\text{Cl}_2$ . Singlet at 2.6 ppm and multiplet at 7.2 ppm is residual toluene.

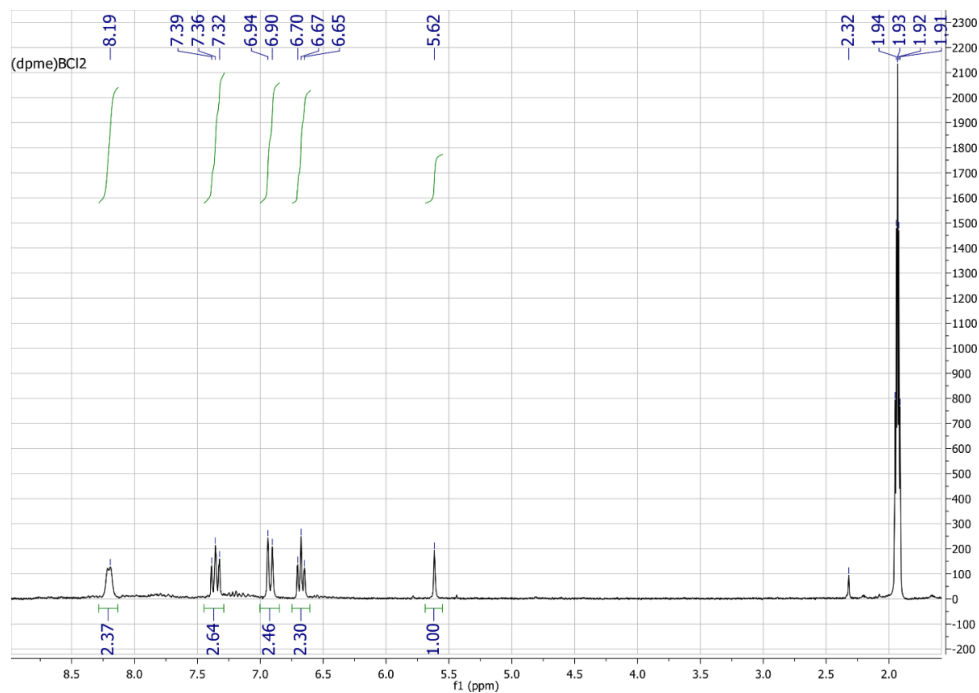

**Fig. S18**  $^1\text{H}$  NMR ( $\text{CD}_3\text{CN}$ ) spectrum of  $(\text{dpme})\text{BCl}_2$ . Singlet at 2.6 ppm and multiplet at 7.2 ppm is residual toluene.

### 3. Additional cyclic voltammetry data for 2a–d

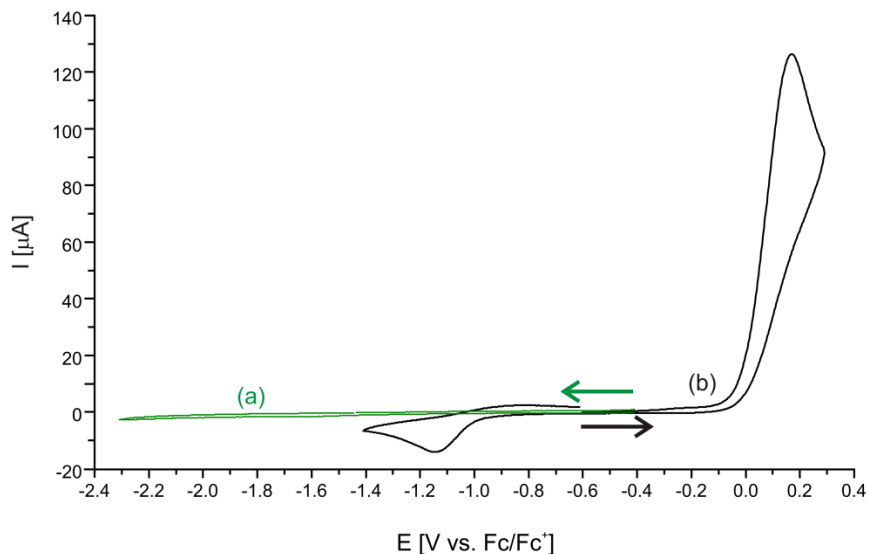

**Fig. S19** Cyclic voltammogram of the dpma ligand in CH<sub>3</sub>CN solution of 0.4 M [(*n*-Bu)<sub>4</sub>N]<sup>+</sup>[PF<sub>6</sub>]<sup>-</sup> at a Pt electrode at room temperature,  $\nu = 0.2 \text{ Vs}^{-1}$ . (a) Initial scan in the negative direction (green) reversing at  $-2.3 \text{ V}$  shows no reduction processes up to the solvent limit. (b) Subsequent scan in the positive direction (black) with an irreversible anodic wave at  $+0.17 \text{ V}$  and a follow-up strongly offset cathodic process at  $-1.15 \text{ V}$ .

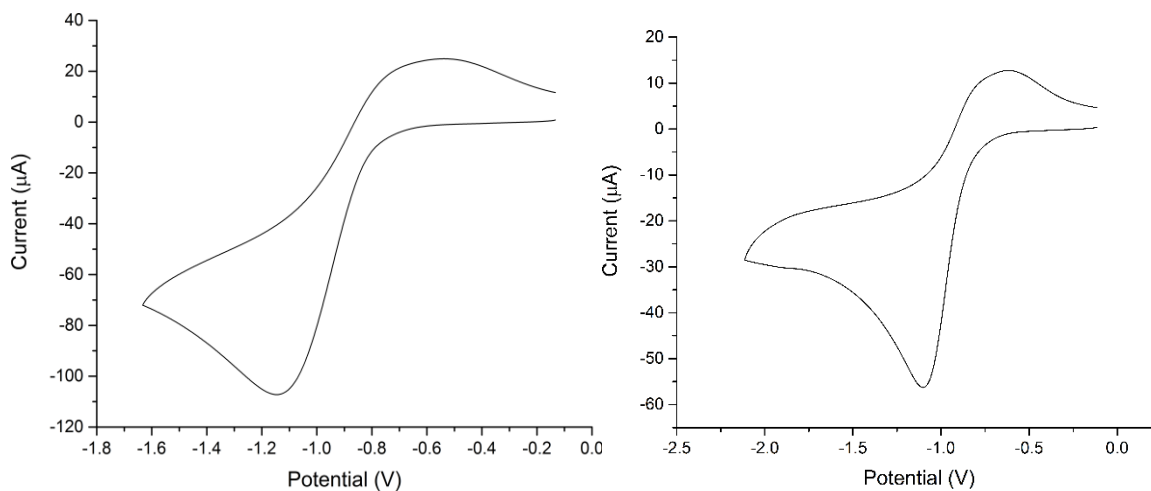

**Fig. S20** Cyclic voltammograms of **2b** (left, 12.3 mM) and **2d** (right, 4.4 mM) in CH<sub>3</sub>CN solutions containing 0.4 M [(*n*-Bu)<sub>4</sub>N]<sup>+</sup>[PF<sub>6</sub>]<sup>-</sup> at a Pt electrode at room temperature,  $\nu = 0.2 \text{ Vs}^{-1}$ .

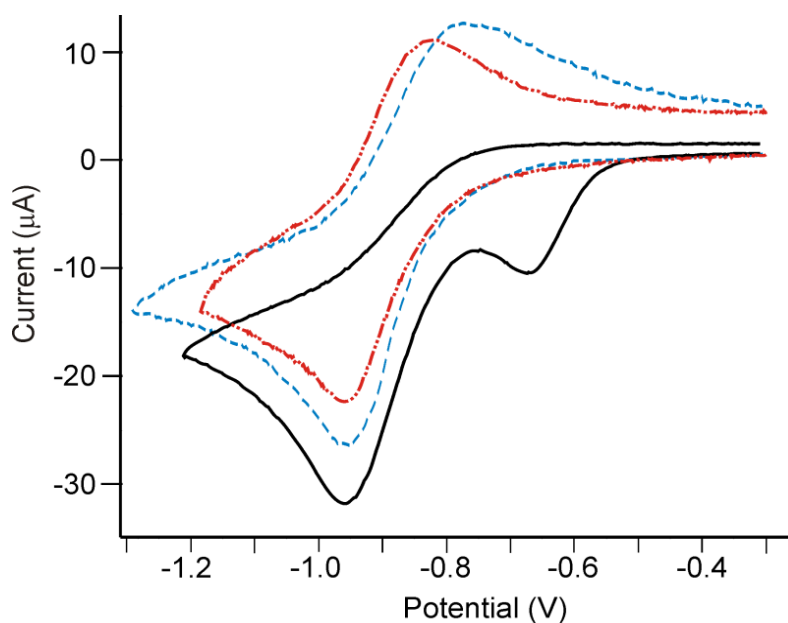

**Fig. S21** Cyclic voltammograms of **2c** in CH<sub>3</sub>CN solutions containing 0.4 M [(n-Bu)<sub>4</sub>N][PF<sub>6</sub>] and a) solid line, 6.3 mM **2c** only; b) dashed line, 1.4 equivalent [(n-Bu)<sub>4</sub>N][Cl] (1.0 mL) added; and c) dashed and dotted line, 4.0 equivalents [(n-Bu)<sub>4</sub>N][Cl] (2.5 mL) added, at a Pt electrode at room temperature,  $\nu = 0.2 \text{ Vs}^{-1}$ .

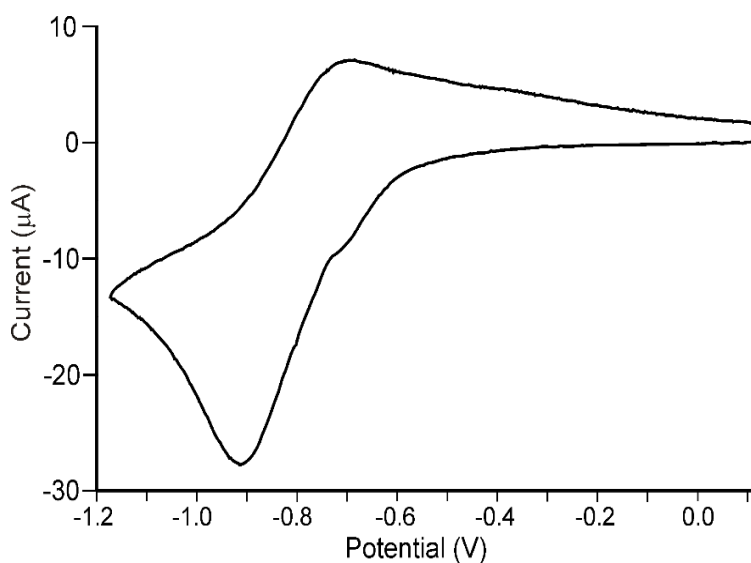

**Fig. S22** Cyclic voltammogram of **2c** (6.3 mM) in CH<sub>2</sub>Cl<sub>2</sub> containing 0.4 M [(n-Bu)<sub>4</sub>N][PF<sub>6</sub>] at a Pt electrode at room temperature,  $\nu = 0.2 \text{ Vs}^{-1}$ .

#### 4. X-ray crystallographic data of $[\text{H}_2(\text{dpma})]^{2+}[\text{BCl}_4]^{-}[\text{Cl}]^{-}$ and $(\text{dpme})\text{BCl}_2$

**Table S1** Crystal data and structure refinement for  $[\text{H}_2(\text{dpma})]^{2+}[\text{BCl}_4]^{-}[\text{Cl}]^{-}$

|                                             |                                                              |
|---------------------------------------------|--------------------------------------------------------------|
| empirical formula                           | $\text{C}_{11}\text{H}_{12}\text{BN}_2\text{Cl}_5$           |
| formula weight                              | 360.29                                                       |
| $T$ , K                                     | 123.0                                                        |
| crystal system                              | monoclinic                                                   |
| space group                                 | $P2_1/n$                                                     |
| $a$ , Å                                     | 9.0046(3)                                                    |
| $b$ , Å                                     | 18.1700(5)                                                   |
| $c$ , Å                                     | 9.9074(3)                                                    |
| $\alpha$ , °                                | 90.00                                                        |
| $\beta$ , °                                 | 104.919(4)                                                   |
| $\gamma$ , °                                | 90.00                                                        |
| volume, Å <sup>3</sup>                      | 1566.34(8)                                                   |
| $Z$                                         | 4                                                            |
| $\rho_{\text{calc}}$ , mg mm <sup>-3</sup>  | 1.528                                                        |
| $\mu$ , mm <sup>-1</sup>                    | 8.321                                                        |
| $F(000)$                                    | 728.0                                                        |
| crystal size, mm <sup>3</sup>               | $0.1 \times 0.1 \times 0.1$                                  |
| $2\Theta$ range for data collection         | 9.74 to 133.88°                                              |
| index ranges                                | $-10 \leq h \leq 10, -21 \leq k \leq 15, -10 \leq l \leq 11$ |
| reflections collected                       | 4969                                                         |
| independent reflections                     | 2764 [ $R(\text{int}) = 0.0335$ ]                            |
| data/restraints/parameters                  | 2764/42/191                                                  |
| $GOF$ on $F^2$                              | 1.069                                                        |
| final $R$ indexes [ $I > 2\sigma(I)$ ]      | $R_1 = 0.0528, wR_2 = 0.1238$                                |
| final $R$ indexes [all data]                | $R_1 = 0.0619, wR_2 = 0.1322$                                |
| largest diff. peak/hole / e Å <sup>-3</sup> | 0.51/−0.32                                                   |

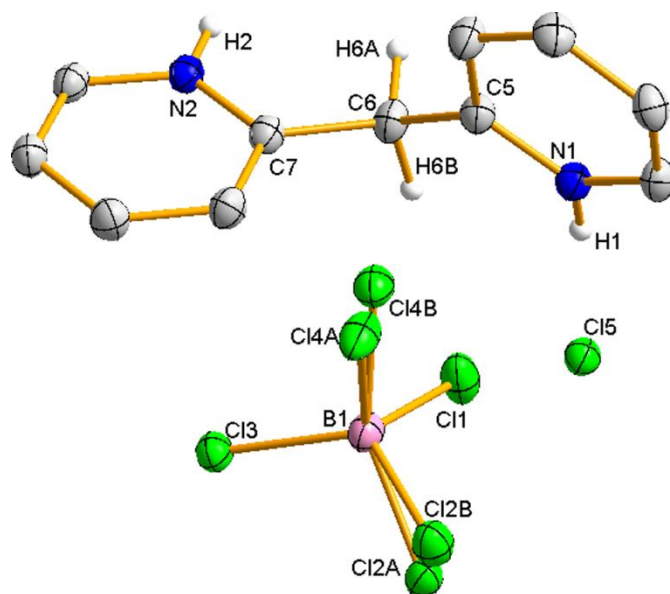

**Fig. S18** X-ray crystal structure of  $[\text{H}_2(\text{dpma})]^{2+}[\text{BCl}_4]^{-}[\text{Cl}]^{-}$ . Thermal ellipsoids are drawn at the 20 % probability level and pyridyl hydrogens are omitted for clarity.



## 5. Results from density functional theory calculations

Optimized coordinates (xyz-format) of dpma, [(dpma)AlCl<sub>2</sub>]<sup>+</sup>, [(dpma)GaCl<sub>2</sub>]<sup>+</sup>, [(dpma)<sub>2</sub>AlCl<sub>2</sub>]<sup>+</sup>, [(dpma)<sub>2</sub>GaCl<sub>2</sub>]<sup>+</sup>, [(dpma)AlCl<sub>2</sub>]<sup>•</sup> and [(dpma)GaCl<sub>2</sub>]<sup>•</sup>

|                                             |           |           |           |                                             |           |          |           |
|---------------------------------------------|-----------|-----------|-----------|---------------------------------------------|-----------|----------|-----------|
| <b>dpma</b>                                 |           |           |           | C                                           | 1.033729  | 2.768567 | 7.190698  |
|                                             |           |           |           | C                                           | 0.102084  | 4.275333 | 8.802948  |
|                                             |           |           |           | C                                           | 1.316143  | 4.935753 | 8.861408  |
| 23                                          |           |           |           | C                                           | -0.043048 | 3.184577 | 7.958712  |
|                                             |           |           |           | C                                           | 1.522592  | 6.147778 | 9.729998  |
| C                                           | 0.475502  | 0.588874  | 0.012556  | C                                           | 3.672407  | 6.221192 | 12.851237 |
| C                                           | 0.358071  | 0.614903  | 1.391006  | H                                           | 1.576715  | 6.495895 | 12.444110 |
| C                                           | 1.241824  | -0.143068 | 2.157774  | H                                           | 5.925180  | 5.479971 | 10.448143 |
| N                                           | 2.202564  | -0.888525 | 1.612253  | H                                           | 5.805603  | 5.879859 | 12.901351 |
| C                                           | 2.305865  | -0.903862 | 0.285807  | H                                           | 3.101833  | 3.172434 | 6.730363  |
| C                                           | 1.471461  | -0.189551 | -0.559337 | H                                           | 0.961263  | 1.920590 | 6.522311  |
| C                                           | 1.170983  | -0.122803 | 3.663234  | H                                           | -0.723504 | 4.615958 | 9.415170  |
| C                                           | 1.882378  | 1.078845  | 4.230586  | H                                           | -0.991338 | 2.662279 | 7.903252  |
| N                                           | 1.128299  | 2.135687  | 4.531772  | H                                           | 0.616019  | 6.332066 | 10.304082 |
| C                                           | 1.733011  | 3.220475  | 5.009240  | H                                           | 3.575506  | 6.394721 | 13.916894 |
| C                                           | 3.101002  | 3.312896  | 5.211126  | Cl                                          | 3.814132  | 7.346346 | 7.245805  |
| C                                           | 3.883082  | 2.212202  | 4.892055  | Cl                                          | 5.640978  | 4.224412 | 7.796234  |
| C                                           | 3.266967  | 1.078169  | 4.393130  | H                                           | 1.666933  | 7.021222 | 9.078261  |
| H                                           | -0.398811 | 1.216393  | 1.881177  | <b>[(dpma)GaCl<sub>2</sub>]<sup>+</sup></b> |           |          |           |
| H                                           | 3.099127  | -1.525671 | -0.120849 | 26                                          |           |          |           |
| H                                           | 1.600808  | -0.244206 | -1.633712 | Ga                                          | 4.063797  | 5.539571 | 8.177666  |
| H                                           | 1.084116  | 4.059712  | 5.245654  | N                                           | 3.912270  | 5.814358 | 10.150976 |
| H                                           | 3.537441  | 4.222066  | 5.607275  | C                                           | 2.538768  | 6.259690 | 12.025609 |
| H                                           | 3.839339  | 0.198750  | 4.121211  | C                                           | 4.987184  | 5.727440 | 10.948352 |
| H                                           | 4.958505  | 2.237630  | 5.031338  | C                                           | 4.892230  | 5.913779 | 12.310764 |
| H                                           | 0.131471  | -0.082670 | 3.992178  | C                                           | 2.693627  | 6.071861 | 10.663258 |
| H                                           | -0.200856 | 1.166828  | -0.607997 | N                                           | 2.341692  | 4.530720 | 8.082828  |
| H                                           | 1.628409  | -1.041953 | 4.032503  | C                                           | 2.209145  | 3.456946 | 7.290210  |
| <b>[(dpma)AlCl<sub>2</sub>]<sup>+</sup></b> |           |           |           | C                                           | 1.025772  | 2.753727 | 7.219381  |
| 26                                          |           |           |           | C                                           | 0.110446  | 4.275032 | 8.827971  |
| Al                                          | 4.034511  | 5.501592  | 8.223476  | C                                           | 1.319174  | 4.948522 | 8.853367  |
| N                                           | 3.903697  | 5.787876  | 10.146593 | C                                           | -0.039764 | 3.170758 | 8.002310  |
| C                                           | 2.554557  | 6.279718  | 12.032375 | C                                           | 1.537216  | 6.171451 | 9.704195  |
| C                                           | 4.987812  | 5.718789  | 10.937680 | C                                           | 3.646637  | 6.183643 | 12.856597 |
| C                                           | 4.910595  | 5.937117  | 12.295763 | H                                           | 1.555546  | 6.464933 | 12.430226 |
| C                                           | 2.692295  | 6.060477  | 10.673525 | H                                           | 5.929867  | 5.501081 | 10.463020 |
| N                                           | 2.354272  | 4.521523  | 8.106316  | H                                           | 5.779712  | 5.844422 | 12.926187 |
| C                                           | 2.221815  | 3.458136  | 7.295415  | H                                           | 3.082112  | 3.173601 | 6.713077  |

|    |           |          |           |
|----|-----------|----------|-----------|
| H  | 0.948404  | 1.895799 | 6.564283  |
| H  | -0.706595 | 4.616099 | 9.451415  |
| H  | -0.983772 | 2.638759 | 7.972497  |
| H  | 0.627680  | 6.381840 | 10.264326 |
| H  | 3.536305  | 6.333000 | 13.924577 |
| Cl | 3.825765  | 7.420734 | 7.190847  |
| Cl | 5.691503  | 4.225529 | 7.757149  |
| H  | 1.708060  | 7.030885 | 9.041033  |

**[(dpma)<sub>2</sub>AlCl<sub>2</sub>]<sup>+</sup>**

49

|    |           |           |           |
|----|-----------|-----------|-----------|
| Al | -4.142763 | 3.249278  | 15.446756 |
| N  | -2.088752 | 3.651053  | 15.269612 |
| N  | -3.924712 | 2.332678  | 13.527726 |
| C  | -4.423706 | 0.249812  | 16.208646 |
| C  | -4.902611 | 2.071072  | 11.358798 |
| H  | -5.752456 | 2.243951  | 10.711238 |
| C  | -5.548994 | 0.257979  | 15.217133 |
| H  | -5.149415 | 0.373029  | 14.206428 |
| H  | -6.049695 | -0.708868 | 15.246868 |
| C  | -6.561131 | 1.334005  | 15.486958 |
| C  | -1.650538 | 1.587856  | 14.030485 |
| H  | -1.917067 | 0.903246  | 14.839625 |
| H  | -0.817602 | 1.131662  | 13.497104 |
| C  | -3.760112 | 1.430503  | 10.906389 |
| H  | -3.689142 | 1.075193  | 9.884747  |
| C  | -7.892980 | 1.002257  | 15.684295 |
| H  | -8.197232 | -0.035937 | 15.634459 |
| C  | -0.405162 | 5.310258  | 15.625194 |
| H  | -0.145173 | 6.275196  | 16.040583 |
| C  | 0.117057  | 3.312963  | 14.437684 |
| H  | 0.811025  | 2.681473  | 13.896824 |
| C  | -8.815528 | 1.999881  | 15.951028 |
| H  | -9.859308 | 1.754302  | 16.110166 |
| N  | -3.709286 | 1.374287  | 16.378474 |
| N  | -6.141258 | 2.609320  | 15.540056 |
| C  | -8.375608 | 3.310184  | 16.019972 |
| H  | -9.051572 | 4.127478  | 16.235261 |
| C  | -2.701328 | 1.269115  | 11.781301 |
| H  | -1.783054 | 0.794418  | 11.458481 |
| C  | -2.807550 | 1.731499  | 13.087046 |
| C  | -1.195516 | 2.898404  | 14.605349 |
| C  | -2.414837 | 0.278390  | 18.067396 |
| H  | -1.621348 | 0.346530  | 18.800327 |

|    |           |           |           |
|----|-----------|-----------|-----------|
| C  | -4.936650 | 2.514052  | 12.663955 |
| H  | -5.791728 | 3.054583  | 13.045850 |
| C  | -4.154491 | -0.896960 | 16.945171 |
| H  | -4.754886 | -1.784091 | 16.786094 |
| C  | 0.522348  | 4.531680  | 14.955336 |
| H  | 1.544705  | 4.869250  | 14.829085 |
| C  | -7.036503 | 3.572242  | 15.812924 |
| H  | -6.642878 | 4.579240  | 15.857041 |
| C  | -2.741764 | 1.382733  | 17.309504 |
| H  | -2.232906 | 2.326012  | 17.452531 |
| C  | -3.135028 | -0.890523 | 17.879624 |
| H  | -2.915948 | -1.778468 | 18.461513 |
| C  | -1.695401 | 4.838577  | 15.757656 |
| H  | -2.457401 | 5.409664  | 16.271617 |
| Cl | -4.648493 | 5.142089  | 14.355676 |
| Cl | -4.280149 | 4.111069  | 17.512712 |

**[(dpma)<sub>Ga</sub>Cl<sub>2</sub>]<sup>+</sup>**

49

|    |           |           |           |
|----|-----------|-----------|-----------|
| Ga | -4.147258 | 3.269204  | 15.453681 |
| N  | -2.037015 | 3.660442  | 15.261222 |
| N  | -3.904633 | 2.321305  | 13.480299 |
| C  | -4.458435 | 0.224162  | 16.251448 |
| C  | -4.858331 | 2.092396  | 11.301896 |
| H  | -5.705129 | 2.261412  | 10.649272 |
| C  | -5.572803 | 0.244605  | 15.245942 |
| H  | -5.159224 | 0.383035  | 14.243913 |
| H  | -6.068759 | -0.725185 | 15.251421 |
| C  | -6.594673 | 1.311840  | 15.519469 |
| C  | -1.627807 | 1.603732  | 14.003845 |
| H  | -1.917910 | 0.935888  | 14.818760 |
| H  | -0.794773 | 1.128321  | 13.487579 |
| C  | -3.698205 | 1.486072  | 10.847309 |
| H  | -3.610603 | 1.156548  | 9.818338  |
| C  | -7.921224 | 0.974763  | 15.743086 |
| H  | -8.220348 | -0.065841 | 15.715456 |
| C  | -0.360917 | 5.324050  | 15.597194 |
| H  | -0.094673 | 6.285474  | 16.016853 |
| C  | 0.145583  | 3.338838  | 14.377837 |
| H  | 0.832596  | 2.716443  | 13.817717 |
| C  | -8.846172 | 1.972068  | 16.005832 |
| H  | -9.885604 | 1.721979  | 16.185123 |
| N  | -3.716664 | 1.330745  | 16.406966 |
| N  | -6.190670 | 2.591381  | 15.544874 |

|    |           |           |           |
|----|-----------|-----------|-----------|
| C  | -8.417197 | 3.287482  | 16.042682 |
| H  | -9.097859 | 4.102765  | 16.250889 |
| C  | -2.643976 | 1.322125  | 11.728239 |
| H  | -1.714855 | 0.870522  | 11.402886 |
| C  | -2.771860 | 1.751394  | 13.043310 |
| C  | -1.160623 | 2.914600  | 14.570760 |
| C  | -2.455876 | 0.242976  | 18.120021 |
| H  | -1.662817 | 0.304378  | 18.854078 |
| C  | -4.913310 | 2.503996  | 12.617682 |
| H  | -5.782289 | 3.017411  | 13.007833 |
| C  | -4.220888 | -0.913381 | 17.012764 |
| H  | -4.840204 | -1.790162 | 16.868651 |
| C  | 0.553942  | 4.556264  | 14.897741 |
| H  | 1.571310  | 4.900886  | 14.751771 |
| C  | -7.082514 | 3.555269  | 15.810488 |
| H  | -6.692024 | 4.565203  | 15.827181 |
| C  | -2.752711 | 1.339814  | 17.337352 |
| H  | -2.221550 | 2.274686  | 17.459092 |
| C  | -3.205602 | -0.910316 | 17.952716 |
| H  | -3.010949 | -1.791026 | 18.553965 |
| C  | -1.645884 | 4.843224  | 15.754233 |
| H  | -2.402150 | 5.401533  | 16.291898 |
| Cl | -4.670638 | 5.177543  | 14.333573 |
| Cl | -4.270355 | 4.132755  | 17.553563 |

**[(dpma)AlCl<sub>2</sub>]<sup>•</sup>**

26

|    |          |          |           |
|----|----------|----------|-----------|
| Al | 3.997454 | 5.644596 | 8.162855  |
| N  | 3.885578 | 5.910435 | 10.045899 |
| C  | 2.467455 | 6.186284 | 11.955403 |
| C  | 4.934434 | 5.686822 | 10.891537 |
| C  | 4.801886 | 5.733929 | 12.249919 |
| C  | 2.647557 | 6.154663 | 10.589044 |
| N  | 2.365856 | 4.668390 | 8.044735  |
| C  | 2.250875 | 3.493590 | 7.357836  |
| C  | 1.122024 | 2.726434 | 7.404291  |
| C  | 0.170668 | 4.309155 | 8.931003  |
| C  | 1.317850 | 5.067914 | 8.838091  |
| C  | 0.040330 | 3.133767 | 8.200384  |
| C  | 1.531155 | 6.335915 | 9.606734  |
| C  | 3.544111 | 5.997353 | 12.814150 |
| H  | 1.473602 | 6.375252 | 12.344573 |
| H  | 5.882873 | 5.466260 | 10.417103 |
| H  | 5.671861 | 5.564308 | 12.871555 |

|    |           |          |           |
|----|-----------|----------|-----------|
| H  | 3.114982  | 3.204105 | 6.772354  |
| H  | 1.080796  | 1.812101 | 6.826057  |
| H  | -0.630967 | 4.655220 | 9.573285  |
| H  | -0.871062 | 2.551315 | 8.243501  |
| H  | 0.616667  | 6.608001 | 10.132340 |
| H  | 3.415012  | 6.054258 | 13.887388 |
| Cl | 3.974637  | 7.464334 | 7.050742  |
| Cl | 5.650657  | 4.384759 | 7.689313  |
| H  | 1.776420  | 7.155186 | 8.911985  |

**[(dpma)GaCl<sub>2</sub>]<sup>•</sup>**

26

|    |           |          |           |
|----|-----------|----------|-----------|
| Ga | 4.025840  | 5.663677 | 8.129463  |
| N  | 3.895076  | 5.943819 | 10.055179 |
| C  | 2.452898  | 6.168483 | 11.946727 |
| C  | 4.935454  | 5.700546 | 10.901973 |
| C  | 4.786736  | 5.718156 | 12.259389 |
| C  | 2.647618  | 6.166240 | 10.580933 |
| N  | 2.346560  | 4.678221 | 8.016078  |
| C  | 2.236651  | 3.494821 | 7.348161  |
| C  | 1.116063  | 2.718124 | 7.425810  |
| C  | 0.179948  | 4.310807 | 8.953685  |
| C  | 1.318597  | 5.080034 | 8.830865  |
| C  | 0.045699  | 3.127392 | 8.237801  |
| C  | 1.539631  | 6.352344 | 9.590086  |
| C  | 3.520386  | 5.967245 | 12.813304 |
| H  | 1.453766  | 6.344000 | 12.328747 |
| H  | 5.888345  | 5.491281 | 10.431196 |
| H  | 5.649531  | 5.538039 | 12.888016 |
| H  | 3.094341  | 3.207748 | 6.752023  |
| H  | 1.071519  | 1.796440 | 6.859643  |
| H  | -0.611871 | 4.655760 | 9.608695  |
| H  | -0.859774 | 2.538089 | 8.304989  |
| H  | 0.624808  | 6.633003 | 10.110618 |
| H  | 3.378374  | 6.001918 | 13.885826 |
| Cl | 4.002221  | 7.517089 | 6.997052  |
| Cl | 5.700448  | 4.365402 | 7.663541  |
| H  | 1.793906  | 7.165539 | 8.892266  |

## 6. Notes and references

1. This geminal coupling is in the typical range observed for methylene groups. See for example, R. C. Cookson, T. A. Crabb, J. J. Frankel, J. Hudec, *Tetrahedron* 1966, **22**, 355–390.
2. The [*trans*-(dpma)<sub>2</sub>MCl<sub>2</sub>]<sup>+</sup> cation (M = Al, Ga) has C<sub>2v</sub> point group with all four pyridyl rings equivalent. This means that its <sup>1</sup>H NMR spectrum should display not eight but four equal intensity multiplets in the aromatic region. The *trans*-isomer is also expected to show significant separation between the two AB doublets because of short contacts between the two chlorine atoms and one of hydrogens at the methylene bridge.
